# Supplementary material for: Cellular heat shock factor 1 positively regulates human immunodeficiency virus-1 gene expression and replication by two distinct pathways
Source: PubMed Central journal article supplement — Nucleic Acids Res. 2011 Apr 1;39(14):5879–92. doi: 10.1093/nar/gkr198 (PMC3152347; doi:10.1093/nar/gkr198), 2011-04-01
Supplement: supp_gkr198_Rawat_and_Mitra_Supplementary_information.pdf [file supp_gkr198_Rawat_and_Mitra_Supplementary_information.pdf]

**Cellular Heat Shock Factor 1 Positively Regulates Human Immunodeficiency Virus-1  
Gene Expression and Replication by Two Distinct Pathways**

**Pratima Rawat and Debashis Mitra\***

**SUPPLEMENTARY INFORMATION**

**Table S1: Primers used in RT-PCR**

| Primer              |         | Primer Sequence                      |
|---------------------|---------|--------------------------------------|
| human $\beta$ Actin | forward | 5' TGACGGGGTTCACCCACACTGTGCCCATCTA3' |
| human $\beta$ Actin | reverse | 5' CTAGAAGCATTTGCCGTGGACGATGGAGGG3'  |
| human HSP40         | forward | 5' CAGGATCCATGGTGGATTACTATGAAG3'     |
| human HSP40         | reverse | 5' GTGGAAGAGAATGAAGTGAGG3'           |

**Table S2: Primers used in HSP40 promoter mutagenesis**

| Mutation site | Primer used in mutagenesis               |
|---------------|------------------------------------------|
| Sp1 site      | 5'GCCGAGGGCGGAGCGTTATTTGCGTGGCCCCGCGC3'  |
| CAAT Box      | 5'GAAAGGGCGGCGGCGTCAGGCCGGCGCCGCGGG 3'   |
| First HSE     | 5'GGGCGGGCGGGGCGTCTGGTTCTGGAGGGGGCTGG3'  |
| Second HSE    | 5'GGGCTGGCGGGCTCTGTCTGCTTCCGCCGGACGGG 3' |

**Table S3: Primers used in EMSA**

| Probes                                                          | Sequence (5' to 3')        |
|-----------------------------------------------------------------|----------------------------|
| P1 (Both NFkb sites of LTR B)                                   | GGGACTTTCGCTGGGGACTTTCC    |
| P2 (NFkB and 3 <sup>rd</sup> Sp1 site from TATA box)            | GGGACTTTC CAGGGA GGT GTGGC |
| P3 (1 <sup>st</sup> and 2 <sup>nd</sup> Sp1 site from TATA box) | TGGGCGGGA CTGGGGAGTGGCG    |
| P4 (2 <sup>nd</sup> and 3 <sup>rd</sup> Sp1 site from TATA box) | GGGAGGTGTGGCCTGGGCGGGAC    |

**Table S4: Primers used in HSP40 promoter ChIP**

| <b>Primer</b> | <b>Sequence</b>              |
|---------------|------------------------------|
| F1 (Fwd)      | 5' GTGGTACCCTCCTCCGACCTGTG3' |
| F2 (Fwd)      | 5' TAGGTACCGGGCGGAAGGTTCT3'  |
| R1 (Rev)      | 5' TACTCGAGACCCCTCCTGCG3'    |
| R2 (Rev)      | 5' TACTCGAGCGCCGCCCTTT 3'    |

**Table S5: Primers used in LTR ChIP**

| <b>Primer</b> | <b>Sequence</b>      |
|---------------|----------------------|
| F1 (Forward)  | GGAGTACTACAAAGACTGCT |
| F2 (Forward)  | TGGGGACTTTCCAGGGAG   |
| F3 (Forward)  | GGCGGGACTGGGGAGTGG   |
| R (Reverse)   | TAACCAGAGAGACCCAGTA  |

**Table S6: Primers used in QRT-PCR**

| <b>Primer</b> |         | <b>Primer Sequence</b>    |
|---------------|---------|---------------------------|
| human GAPDH   | forward | 5'GAAGGTGAAGGTCGGAGTC3'   |
| human GAPDH   | reverse | 5'GAAGATGGTGATGGGATTTC3'  |
| human HSF1    | forward | 5' GCCTTCCTGACCAAGCTGT3'  |
| human HSF1    | reverse | 5' AAGTACTTGGGCAGCACCTC3' |
